# Supplementary material for: 3D printing of Mo-containing scaffolds with activated anabolic responses and bi-lineage bioactivities
Source: PubMed Central journal article supplement — Theranostics. 2018 Jul 30;8(16):4372–92. doi: 10.7150/thno.27088 (PMC6134938; doi:10.7150/thno.27088), 2018-07-30
Supplement: thnov08p4372s1.pdf [file thnov08p4372s1.pdf]

## Supporting Information

Table S1. Quantitative analysis of elements contained in Mo-BGC scaffolds

| Element<br>Sample | Mo<br>(at%) | Ca<br>(at%) | Si<br>(at%) | P<br>(at%) |
|-------------------|-------------|-------------|-------------|------------|
| BGC               | 0           | 28.41       | 68.03       | 3.56       |
| 2Mo-BGC           | 1.83        | 24.79       | 69.31       | 4.07       |
| 5Mo-BGC           | 5.07        | 21.92       | 68.78       | 4.23       |
| 7.5Mo-BGC         | 7.43        | 18.99       | 69.36       | 4.22       |

Table S2. The concentration (mg/L) of elements in diluted solutions of BGC and 7.5Mo-BGC powder extracts (200 mg/mL) in DMEM (a) and HBMSCs basal medium (b)

| <b>a</b>  | <b>BGC</b> | <b>BGC</b> | <b>BGC</b> | <b>BGC</b>  | <b>7.5Mo-BGC</b> | <b>7.5Mo-BGC</b> | <b>7.5Mo-BGC</b> | <b>7.5Mo-BGC</b> |
|-----------|------------|------------|------------|-------------|------------------|------------------|------------------|------------------|
|           | <b>1</b>   | <b>1/2</b> | <b>1/8</b> | <b>1/64</b> | <b>1</b>         | <b>1/2</b>       | <b>1/8</b>       | <b>1/64</b>      |
| <b>Mo</b> | 0.01       | 0.01       | 0.01       | 0.01        | 47.83            | 23.86            | 5.93             | 0.82             |
| <b>Ca</b> | 71.95      | 189.30     | 277.30     | 302.97      | 30.87            | 168.76           | 272.17           | 302.33           |
| <b>P</b>  | 9.5        | 68.02      | 111.90     | 124.72      | 1.53             | 64.04            | 110.91           | 124.57           |
| <b>Si</b> | 121.78     | 60.97      | 15.24      | 1.90        | 58.29            | 29.23            | 7.31             | 0.91             |
| <b>b</b>  | <b>BGC</b> | <b>BGC</b> | <b>BGC</b> | <b>BGC</b>  | <b>7.5Mo-BGC</b> | <b>7.5Mo-BGC</b> | <b>7.5Mo-BGC</b> | <b>7.5Mo-BGC</b> |
|           | <b>1</b>   | <b>1/2</b> | <b>1/8</b> | <b>1/64</b> | <b>1</b>         | <b>1/2</b>       | <b>1/8</b>       | <b>1/64</b>      |
| <b>Mo</b> | 0.02       | 0.01       | 0.02       | 0.01        | 25.80            | 12.85            | 3.23             | 0.46             |
| <b>Ca</b> | 147.67     | 250.36     | 327.37     | 349.83      | 116.38           | 234.71           | 323.46           | 349.34           |
| <b>P</b>  | 13.50      | 92.76      | 152.24     | 169.54      | 2.02             | 87.02            | 150.77           | 169.36           |
| <b>Si</b> | 158.68     | 79.47      | 20.07      | 2.74        | 47.37            | 23.82            | 6.15             | 1.00             |

Table S3. Primer sequences of gene used for quantitative PCR

| Gene name                       | sequences                                                           |
|---------------------------------|---------------------------------------------------------------------|
| SOX9<br>(rabbit)                | 5'-GGTGCTCAAGGGCTACGACT-3'<br>5'-GGGTGGTCTTTCTTGTGCTG-3'            |
| COL II<br>(rabbit)              | 5'-AACACTGCCAACGTCCAGAT-3'<br>5'-CTGCAGCACGGTATAGGTGA-3'            |
| ACAN<br>(rabbit)                | 5'-AGGTCGTGGTGAAAGGTGTTG-3'<br>5'-GTAGGTTCTCACGCCAGGGA-3'           |
| N-cadh<br>(rabbit)              | 5'-TCATCTTCGTTTCCATTGGA-3'<br>5'-TAAGAACTCTGTAAGTTTTGGCAGC-3'       |
| COL I<br>(human being)          | 5'-GAGGGCCAAGACGAAGACATC-3'<br>5'-CAGATCACGTCATCGCACAAAC-3'         |
| OCN<br>(human being)            | 5'-CACTCCTCGCCCTATTGGC-3'<br>5'-CCCTCCTGCTTGGACACAAAG-3'            |
| BMP2<br>(human being)           | 5'-TTCGGCCTGAAACAGAGACC-3'<br>5'-CCTGAGTGCCTGCGATACAG-3'            |
| RUNX2<br>(human being)          | 5'-TGGTTACTGTCATGGCGGGTA-3'<br>5'-TCTCAGATCGTTGAACCTTGCTA-3'        |
| HIF-1 $\alpha$<br>(rabbit)      | 5'-CCATGTGACCATGAGGAAAT-3'<br>5'-CGGCTAGTTAGGGTACACTT-3'            |
| HIF-1 $\alpha$<br>(human being) | 5'-ATCCATGTGACCATGAGGAAAT-3'<br>5'-CTCGGCTAGTTAGGGTACACTT-3'        |
| SOX9<br>(human being)           | 5'-CTTTGTTTTGTGTTTCGTGTTTTG-3'<br>5'-AGAGAAAGAAAAGGGAAAGGTAAGTTT-3' |
| COL II<br>(human being)         | 5'-CCGAATAGCAGGTTACGTACA-3'<br>5'-CGATAACAGTCTTGCCCCACTT-3'         |
| ACAN<br>(human being)           | 5'-TTCAGTGGCCTACCAAGTGG-3'<br>5'-AGCCTGGGTTACAGATTCCA-3'            |
| HIF-2 $\alpha$<br>(rabbit)      | 5'-TCATCTACAACCCGCGCAAC-3'<br>5'-ATCAGGTGCGGCTTGAACAG-3'            |
| HIF-2 $\alpha$<br>(human being) | 5'-ACCTGAAGATTGAAGTGATTGAG-3'<br>5'-GTGGCTGGAAGATGTTTGTC-3'         |
| TIMP3<br>(rabbit)               | 5'-CATCCACACGGAAGCCTCTGA-3'<br>5'-TTACAGCCCAGGTGGTAGCG-3'           |
| TIMP3<br>(human being)          | 5'-GTCGCGTCTATGATGGCAAG-3'<br>5'-ATTCTTTCTGGCATGGCACC-3'            |
| MMP13<br>(rabbit)               | 5'-AGGAGCATGGCGACTTCTAC-3'<br>5'-TAAAAACAGCTCCGCATCAA-3'            |
| MMP13<br>(human being)          | 5'-AGGAGCATGGCGACTTCTACCC-3'<br>5'-TTTGTCTGGCGTTTTTGGATGTTT-3'      |
| ADAMTS5<br>(rabbit)             | 5'-TGTCTGCCAGCGGATGT-3'<br>5'-ACGGAATTACTGTACGGCCTACA-3'            |
| ADAMTS5<br>(human being)        | 5'-GTCCAAATGCACTTCAGCCA-3'<br>5'-GGTGGCATCGTAGGTCTGTC-3'            |

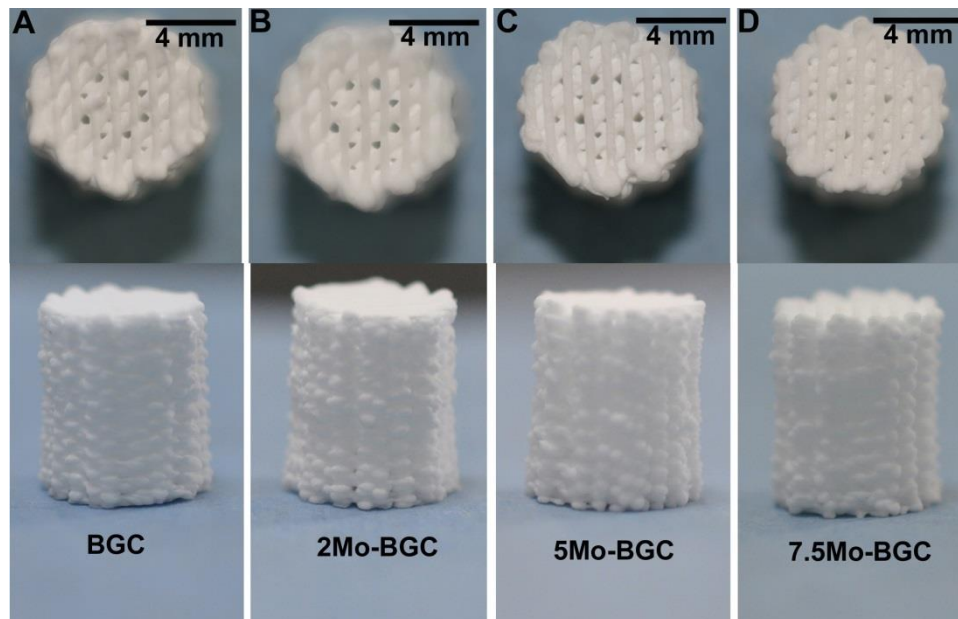

Figure S1. Representative photographs of BGC (A), 2Mo-BGC (B), 5Mo-BGC (C) and 7.5Mo-BGC (D) scaffolds used for compressive strength test.

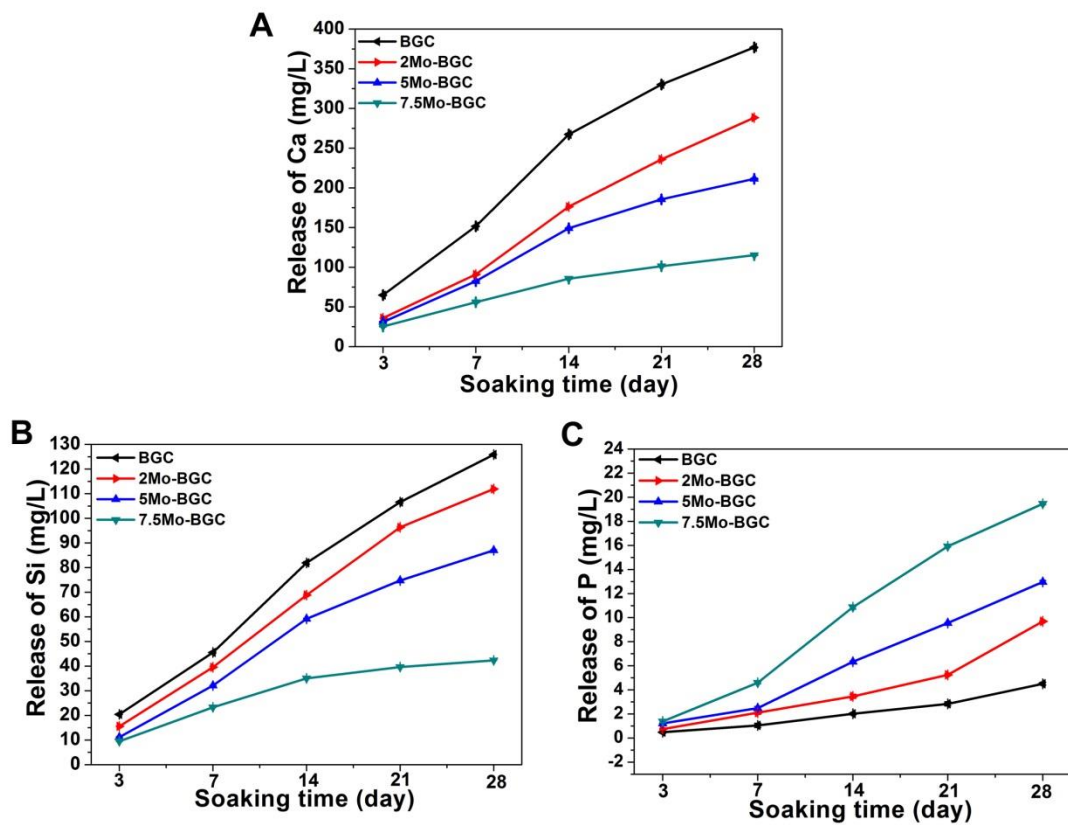

Figure S2. The average release rates of Ca (A), Si (B) and P (C) from scaffolds in tris-HCl solution at each time point (n=3). It showed that Ca, Si and P from scaffolds could be released into tris-HCl solution continuously.
